# Supplementary material for: Facile synthesis of Tb-decorated graphene oxide: electrochemical stability, hydrogen storage, and corrosion inhibition of Mg AZ13 alloy in 3.5% NaCl medium
Source: Royal Society of Chemistry journal article supplement (doi:10.1039/d0ra08766a), 2020-12-24
Supplement: d0ra08766a1.pdf [file d0ra08766a1.pdf]

Supporting Information for the article

Facile method of synthesis of the Tb-decorated graphene oxide: electrochemical stability, hydrogen storage, and corrosion inhibition of the Mg AZ13 alloy in 3.5% NaCl medium

N.Palaniappan,<sup>a</sup> I.S.Cole,<sup>b\*</sup> A. Kuznetsov,<sup>c</sup> S. Manikam

Table S1. Calculated species, M062X/[Tb:SDD;C,H,O,Cl:6-31G\*], gas phase/H<sub>2</sub>O.

| Spin                                                      | E <sub>0</sub> , A.U.    | E <sub>0</sub> +ZPE, A.U. | ΔE,<br>kcal/mol | E(HOMO/LUMO),<br>A.U.                                            | ΔE(HOMO/<br>LUMO),<br>kcal/mol/eV |
|-----------------------------------------------------------|--------------------------|---------------------------|-----------------|------------------------------------------------------------------|-----------------------------------|
| <b>C42Oxo-OTbCl3, OTbCl3 close to edge</b>                |                          |                           |                 |                                                                  |                                   |
| <sup>7</sup> A                                            | -4417.371029//           | -4416.883078//            | 6.09            | -0.24045/ -0.14410                                               |                                   |
|                                                           | -4417.445733             | -4416.958164              |                 | -0.24039/ -0.14395//<br>-0.23878/ -0.14064<br>-0.23872/ -0.14050 |                                   |
| <sup>5</sup> A                                            | -4417.351584//           | -4416.865222//            | 17.08           | -0.26441/ -0.16243                                               |                                   |
|                                                           | -4417.428218             | -4416.942413              |                 | -0.22304/ -0.09470//<br>-0.26193/ -0.15691<br>-0.22044/ -0.09105 |                                   |
| <b>C42Oxo-O(H<sup>+</sup>)TbCl3, OTbCl3 close to edge</b> |                          |                           |                 |                                                                  |                                   |
| <sup>7</sup> A                                            | -4417.758153//           | -4417.257691//            | 4.38            | -0.33799/ -0.24661                                               |                                   |
|                                                           | -4417.878037             | -4417.378083              |                 | -0.33796/ -0.24644//<br>-0.24826/ -0.15258<br>-0.24821/ -0.15244 |                                   |
| <b>C42Oxo-OTbCl3, OTbCl3 in the center</b>                |                          |                           |                 |                                                                  |                                   |
| <sup>7</sup> A                                            | -4417.378656             | -4416.889700//            | 0.0             | -0.25301/ -0.14034                                               | 3.10                              |
|                                                           | 10i,8i//<br>-4417.455434 | -4416.966634              |                 | -0.25294/ -0.14023//<br>-0.25043/ -0.13634<br>-0.25036/ -0.13623 |                                   |
| <sup>5</sup> A                                            | -4417.346870             | -4416.860395//            | 20.31           | -0.25996/ -0.16816                                               |                                   |
|                                                           | 9i//<br>-4417.423066     | -4416.936297              |                 | -0.21522/ -0.08637//<br>-0.25491/ -0.16170<br>-0.21486/ -0.08151 |                                   |
| <b>C42Oxo-O(H<sup>+</sup>)TbCl3, OTbCl3 in the center</b> |                          |                           |                 |                                                                  |                                   |
| <sup>7</sup> A                                            | -4417.765965//           | -4417.264544//            | 0.0             | -0.35066/ -0.24286                                               |                                   |
|                                                           | -4417.885014             | -4417.384042              |                 | -0.35062/ -0.24279//<br>-0.26057/ -0.14972<br>-0.26055/ -0.14968 |                                   |

**Table S2. M062X/[Tb:SDD; C,H,O,Cl:6-31G\*], gas phase//water.**

| C36OH_CO2H_TbOCl3, |                                      |                                    |  |                                                                                        |  |
|--------------------|--------------------------------------|------------------------------------|--|----------------------------------------------------------------------------------------|--|
| <sup>2</sup> A     | -3886.117870//                       | -3885.706424//                     |  | -0.25691/ -0.13592<br>-0.22555/ -0.14409//                                             |  |
| <sup>6</sup> A     | -3886.332240//<br><br>-3886.404255   | -3885.920484//<br><br>-3885.992778 |  | -0.25690/ -0.13563<br>-0.22541/ -0.14382//<br>-0.25417/ -0.12527<br>-0.22265/ -0.13391 |  |
| <sup>4</sup> A     | -3886.301625//<br><br>-3886.370052   | -3885.892301//<br><br>-3885.960894 |  | -0.27841/ -0.16908<br>-0.22136/ -0.08889//<br>-0.27404/ -0.16284<br>-0.21538/ -0.08259 |  |
| OTbCl3-middle      |                                      |                                    |  |                                                                                        |  |
| <sup>6</sup> A     | -3886.330836<br>9i//<br>-3886.396833 | -3885.919806//<br><br>-3885.985462 |  | -0.25417/ -0.10723<br>-0.21196/ -0.08931//<br>-0.24701/ -0.09913<br>-0.20463/ -0.07915 |  |
|                    |                                      |                                    |  |                                                                                        |  |
